# Supplementary material
Source: publisher figshare collection journal article supplement (https://geolsoc.figshare.com/articles/dataset/_/3453785)
Supplement: Supplementary file 1 [file 1]

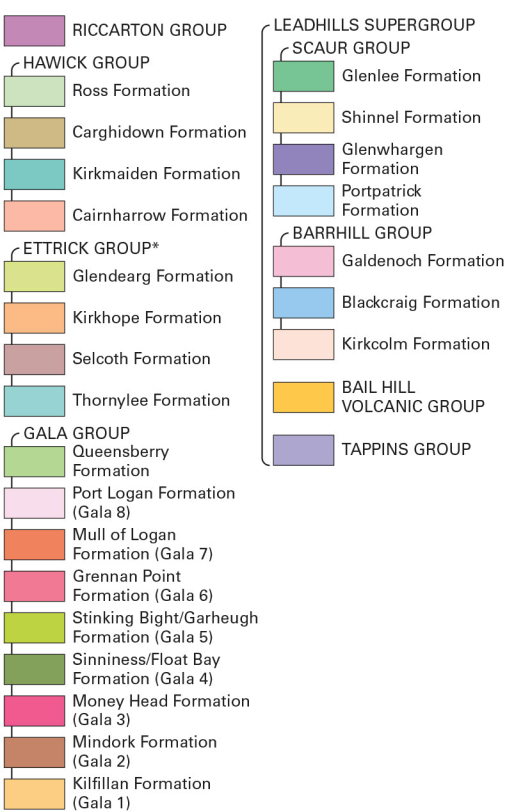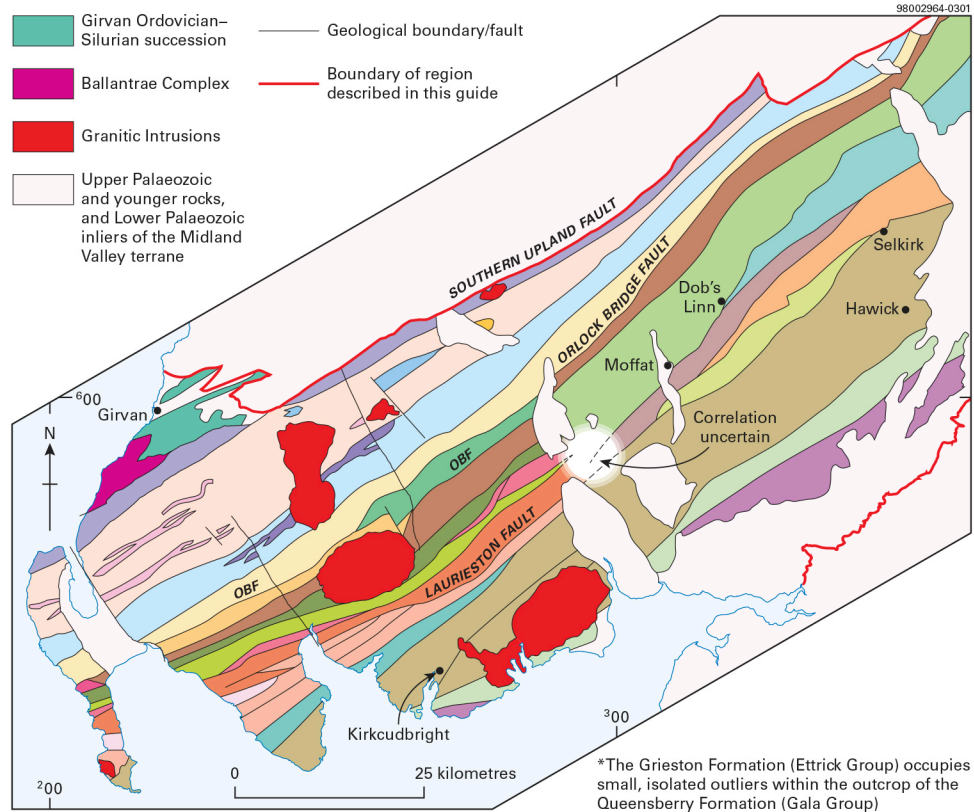

\*The Grieston Formation (Ettrick Group) occupies small, isolated outliers within the outcrop of the Queensberry Formation (Gala Group)
