# Supplementary material
Source: publisher figshare collection journal article supplement (https://geolsoc.figshare.com/articles/dataset/_/3453785)
Supplement: Supplementary file 2 [file 1]

The Upper Palaeozoic and Mesozoic stratigraphy of northern England extends locally across the border into southern Scotland. Conversely, the Lower Palaeozoic stratigraphy of southern Scotland extends locally across the border into northern England.

— Geological boundary  
 — Boundary of region described in this guide

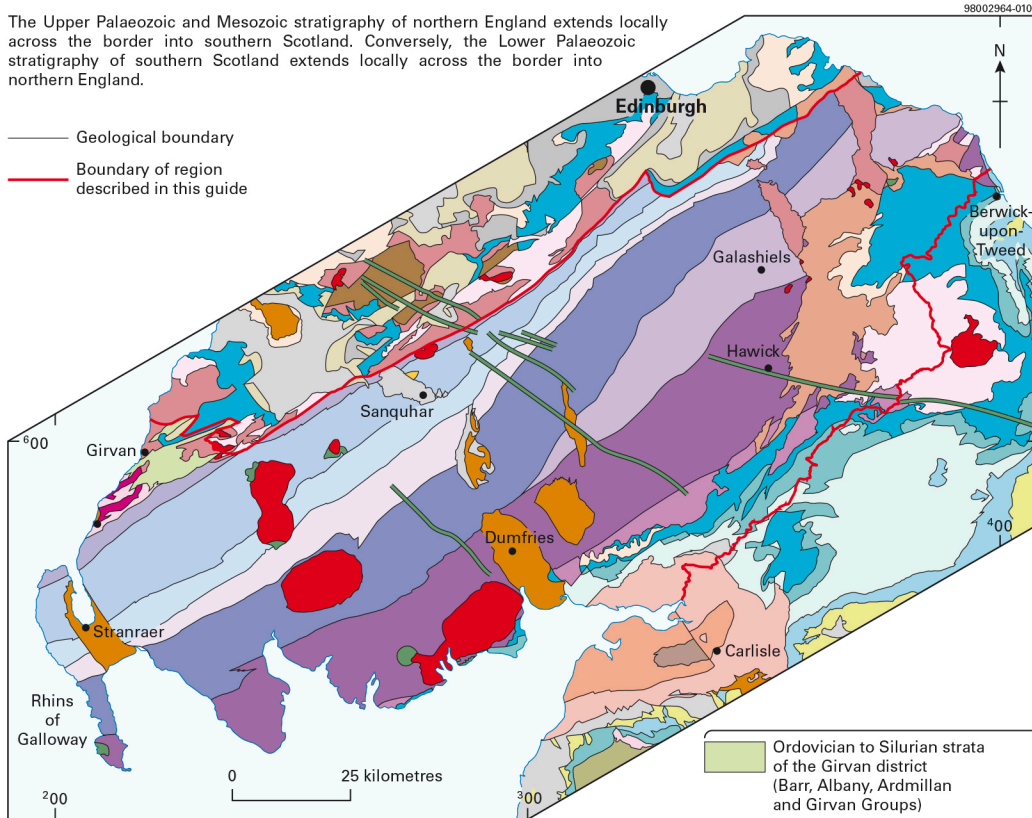

- SOUTHERN SCOTLAND**
- Stewartry Group
  - Scottish Coal Measures Group
  - Clackmannan Group
  - Strathclyde Group
  - Inverclyde Group
  - Stratheden Group
  - Upper "Old Red Sandstone"
  - Reston and Lanark Groups
  - Lower "Old Red Sandstone"
  - Inliers of Silurian strata in the Midland Valley Terrane
  - Riccarton Group
  - Hawick Group
  - Ettrick Group
  - Gala Group
  - Scaur Group
  - Shinell and Glenlee Formations
  - Portpatrick and Glenwharogen Formations
  - Barrhill Group
  - Kirkcolm, Galdenoch and Blackcraig Formations
  - Bail Hill Volcanic Group
  - Tappins Group
  - Balcreuchan Group mafic lavas
  - Ultramafic rocks
- PERMIAN**
- CARBONIFEROUS**
- DEVONIAN**
- SILURIAN**
- Landoverly-Wenlock
- Moffat Shale Group at the base of each division
- ORDOVICIAN**
- Caradoc-Ashgill
- Tremadoc-Arenig
- Palaeogene**
- EARLY DEVONIAN**

- NORTHERN ENGLAND**
- Lias Group
  - Mercia Mudstone Group
  - Sherwood Sandstone Group
  - Appleby Group
  - Pennine Coal Measures Group
  - Yoredale Group
  - Stainmore Formation
  - Alston Formation
  - Tyne Limestone Formation
  - Border Group (Great Scar Limestone Group in Cumbria)
  - Inverclyde Group
  - Eycott Volcanic Group
  - Skiddaw Group
- JURASSIC**
- TRIASSIC**
- PERMIAN**
- CARBONIFEROUS**
- ORDOVICIAN**
- Caradoc-Arenig
- Tremadoc-Arenig
- Palaeogene**
- EARLY DEVONIAN**

- Upper Palaeozoic Mafic lavas
- Carboniferous and Permian
- Devonian
- Intrusive
- Granitic rocks
- Dioritic rocks
- Dolerite dykes

98002984-0102
